# Supplementary material for: Purification and Structure Characterization of the Crude Polysaccharide from the Fruiting Bodies of Butyriboletus pseudospeciosus and Its Modulation Effects on Gut Microbiota
Source: MDPI journal article supplement (doi:10.3390/molecules28062679), 2023-03-16
Supplement: s1 [file s1]

## Supplementary Materials

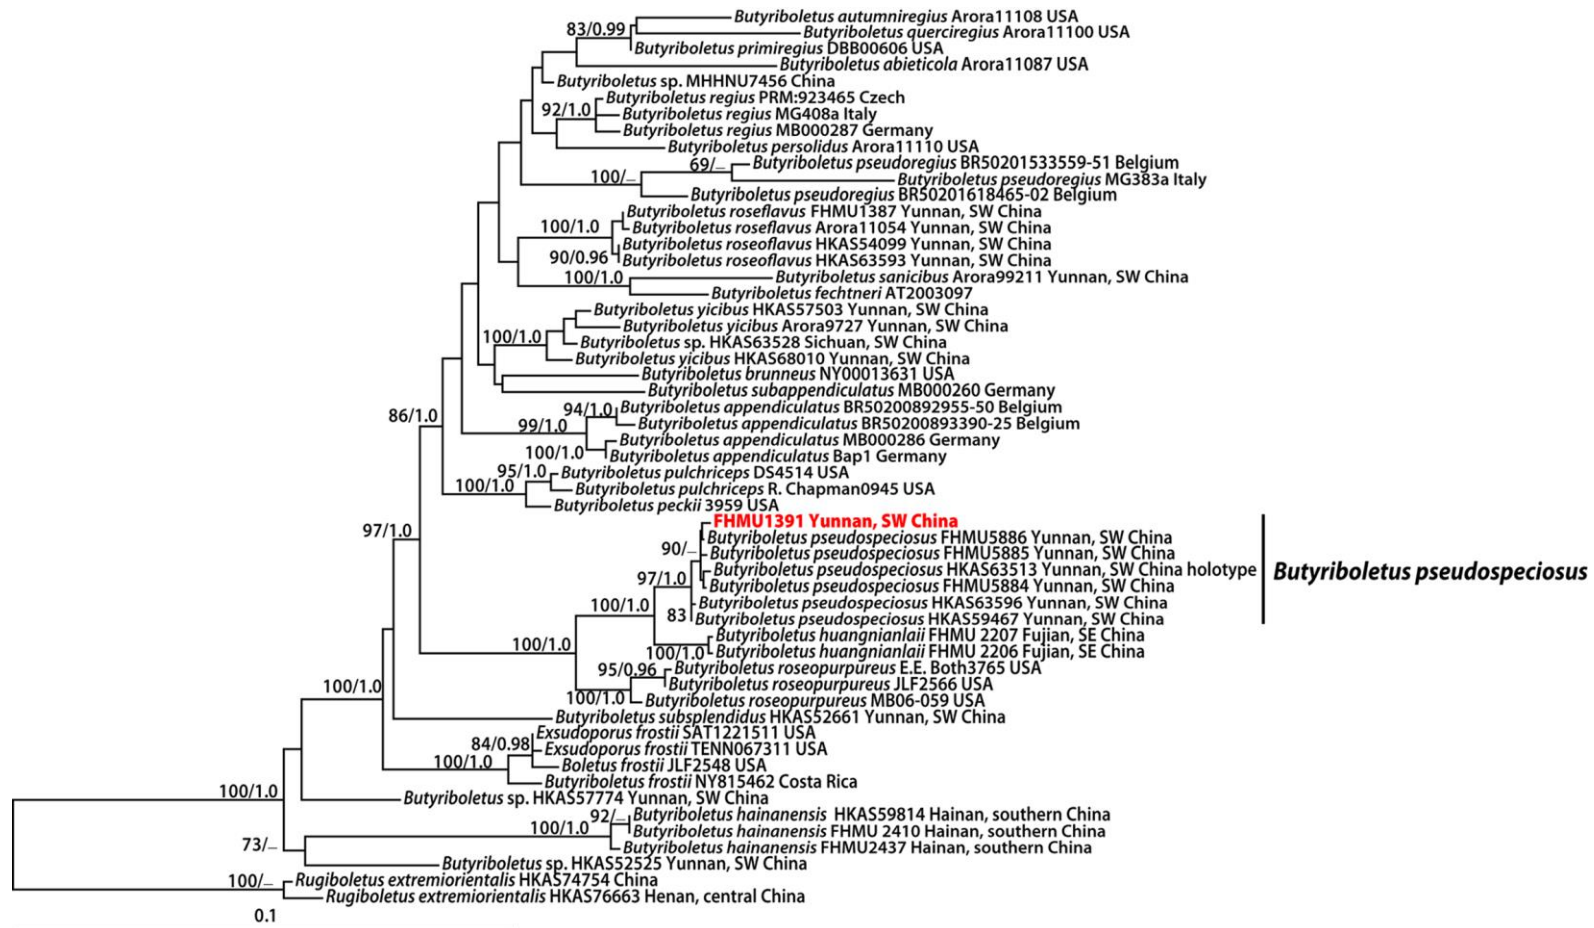

**Figure S1:** Phylogram of *Butyriboletus* inferred from a multilocus (rDNA 28S, ITS, tef1, and RPB2) dataset using RAxML. [BS ( $\geq 50\%$ ) and PP ( $\geq 0.95$ ) are indicated above the branches]

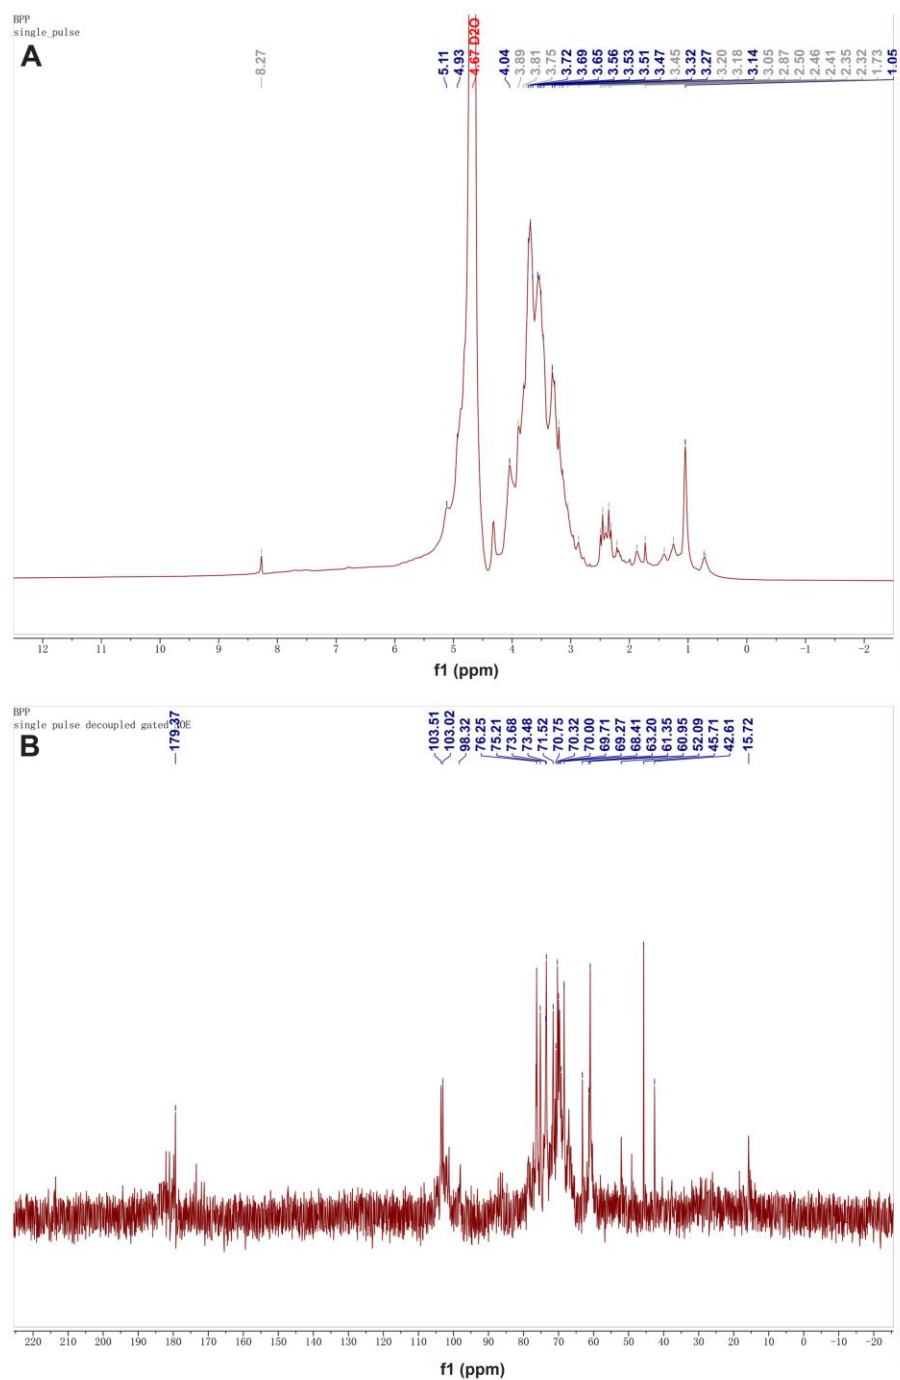

**Figure S2:** NMR spectra of BPP. (A)  $^1\text{H}$  NMR spectrum of BPP. (B)  $^{13}\text{C}$  NMR spectrum of BPP

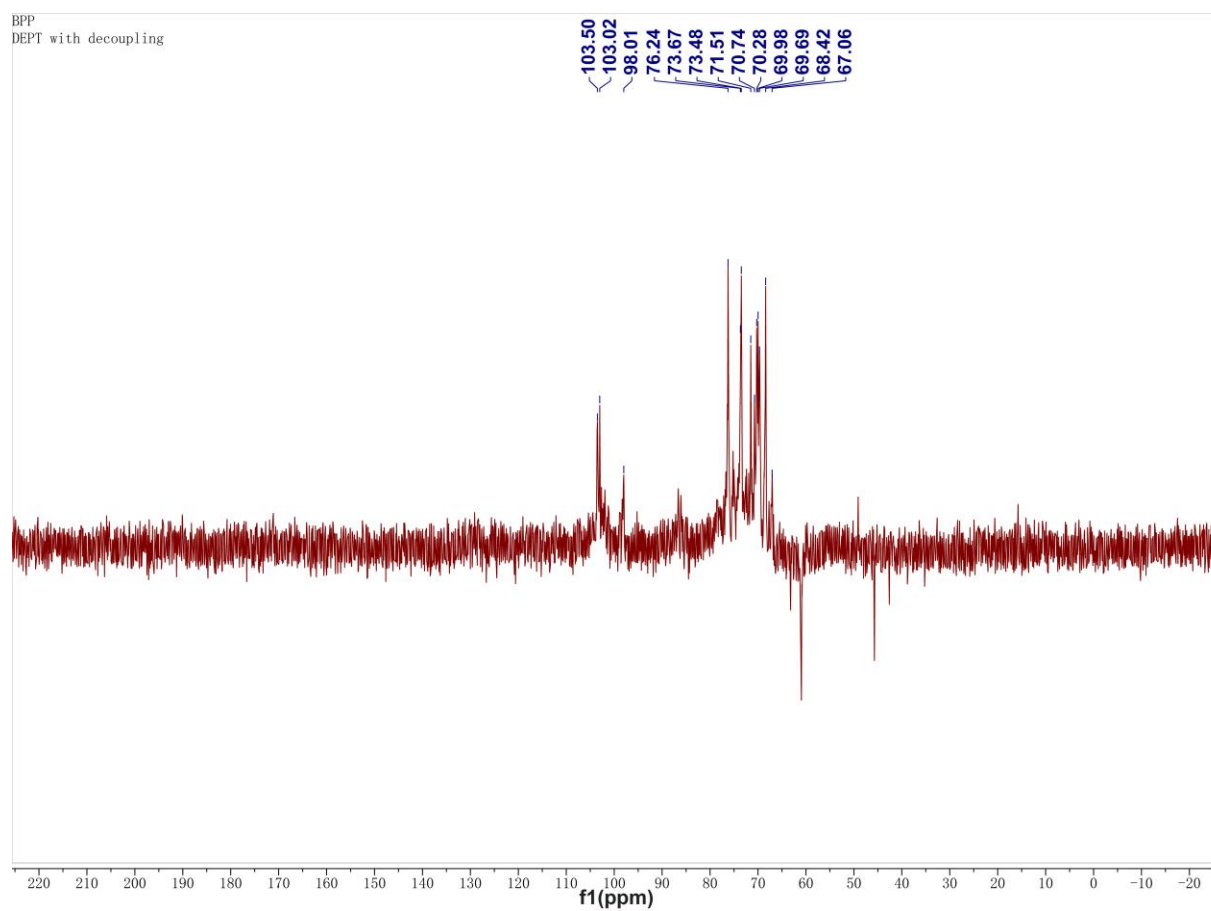

**Figure S3:** DEPT-135 spectra of BPP;

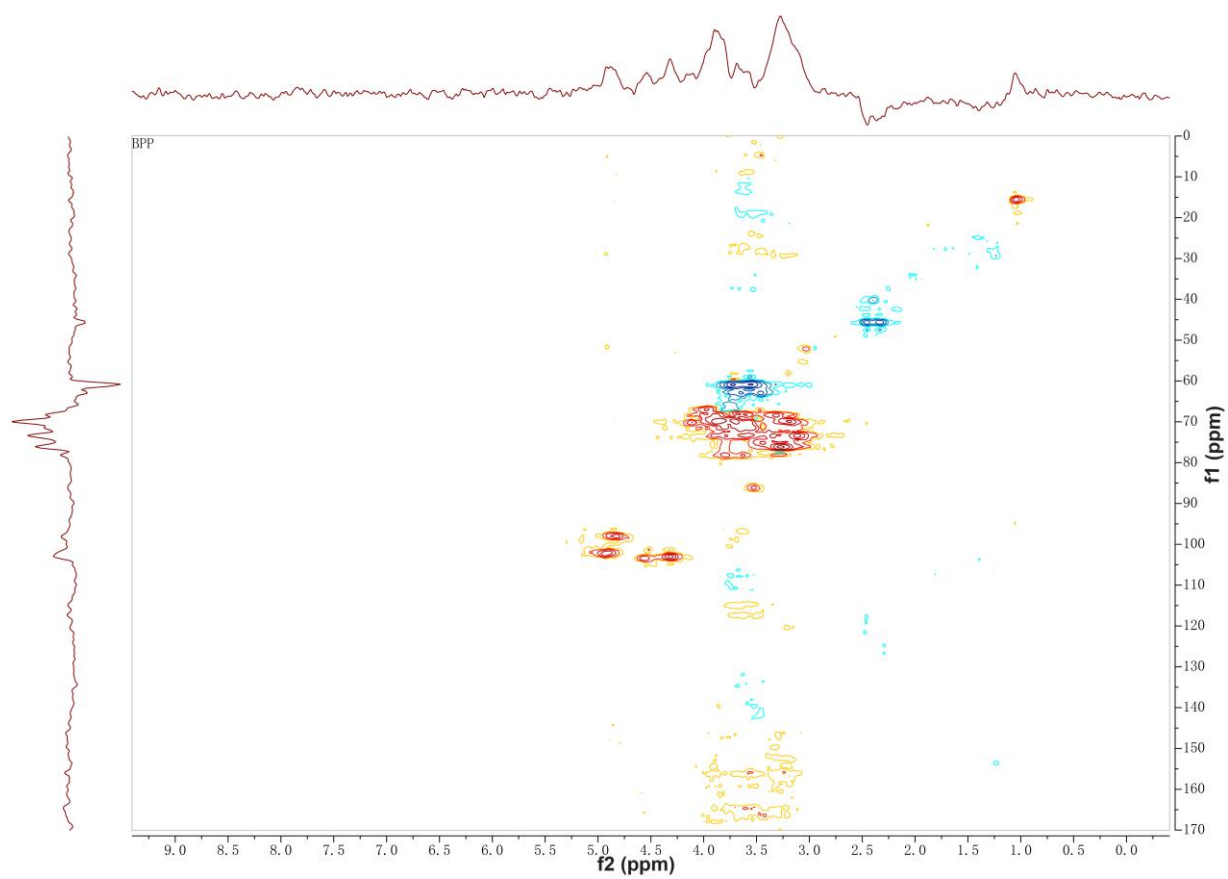

**Figure S4:** HSQC spectra of BPP;

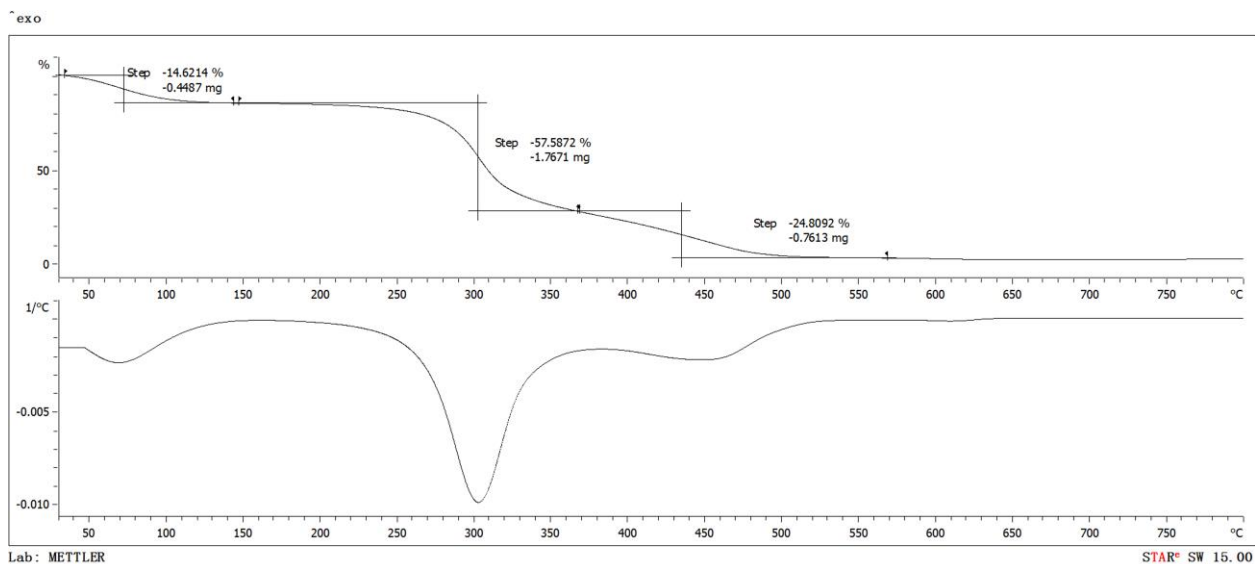

**Figure S5:** TG analysis of BPP under atmosphere at a heating rate of 10 K/min

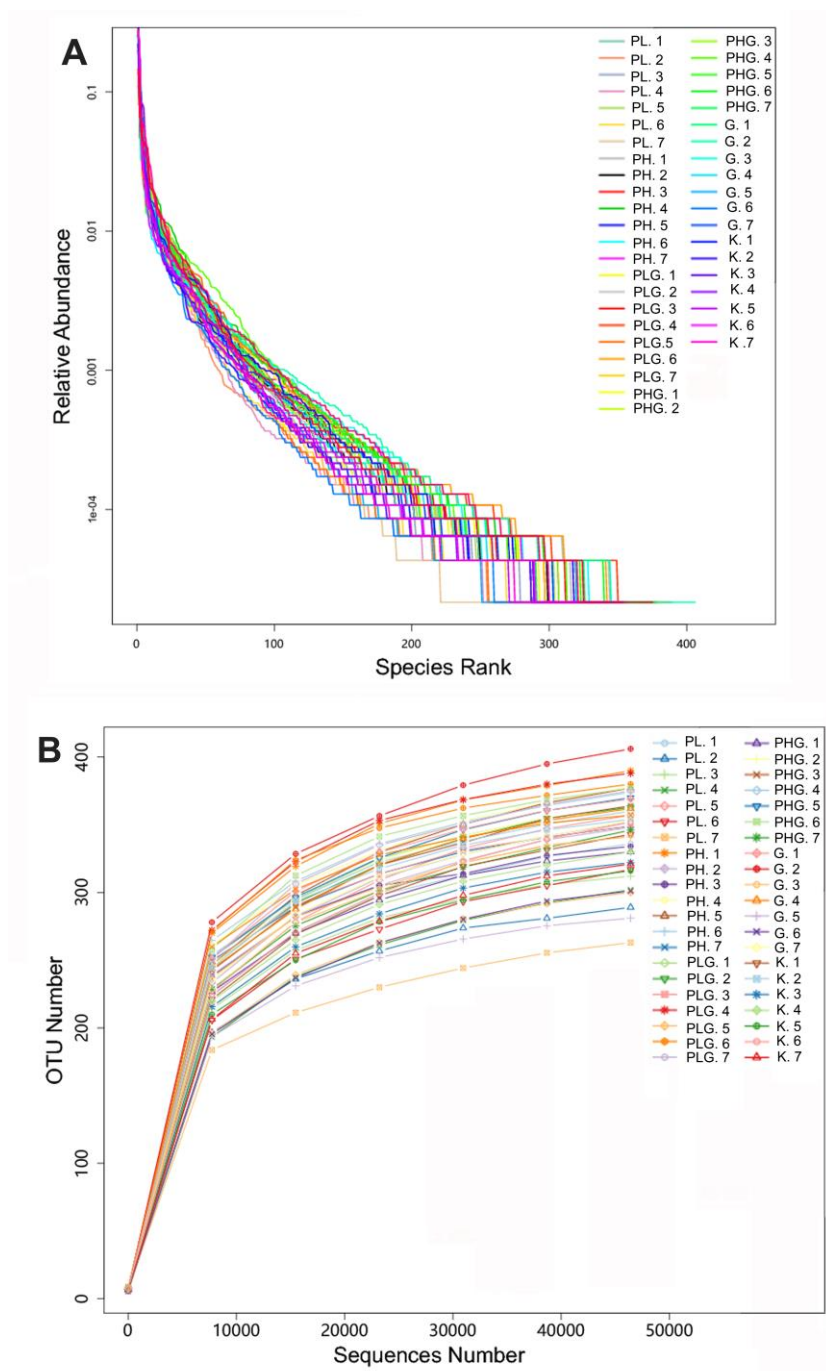

**Figure S6:** KEGG metabolic pathways at the second level

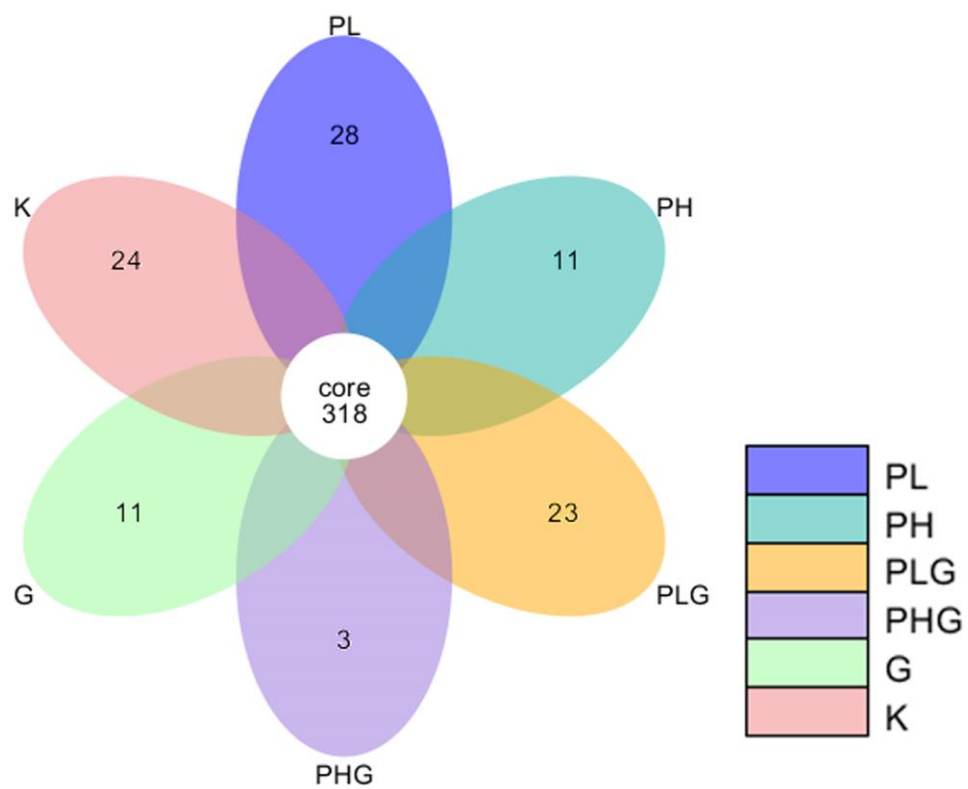

**Figure S7:** The flower figure OTUs distribution of flora with different treatments
